# Supplementary material for: Whole Genome Sequencing Refines Knowledge on the Population Structure of Mycobacterium bovis from a Multi-Host Tuberculosis System
Source: MDPI journal article supplement (doi:10.3390/microorganisms9081585), 2021-07-26
Supplement: s1 [file s1]

# Whole Genome Sequencing refines knowledge on the population structure of *Mycobacterium bovis* from a Multi-Host Tuberculosis System

Ana C Reis <sup>1,2</sup>, Liliana C.M. Salvador <sup>3,4,5</sup>, Suelee Robbe-Austerman <sup>6</sup>, Rogério Tenreiro <sup>2</sup>, Ana Botelho <sup>7</sup>, Teresa Albuquerque<sup>7</sup>, Mónica V. Cunha<sup>1,2\*</sup>

<sup>1</sup> Centre for Ecology, Evolution and Environmental Changes (cE3c), Faculdade de Ciências da Universidade de Lisboa, Lisboa, Portugal; [ana.reis714@gmail.com](mailto:ana.reis714@gmail.com); [mscunha@fc.ul.pt](mailto:mscunha@fc.ul.pt)

<sup>2</sup> Biosystems & Integrative Sciences Institute (BioISI), Faculdade de Ciências da Universidade de Lisboa, Lisboa, Portugal; [rptenreiro@fc.ul.pt](mailto:rptenreiro@fc.ul.pt)

<sup>3</sup> Department of Infectious Diseases, College of Veterinary Medicine, University of Georgia, Athens, Georgia, USA; [salvador@uga.edu](mailto:salvador@uga.edu)

<sup>4</sup> Institute of Bioinformatics, University of Georgia, Athens, Georgia, USA

<sup>5</sup> Center for the Ecology of Infectious Diseases, University of Georgia, Athens, Georgia, USA

<sup>6</sup> USDA/APHIS National Veterinary Services Laboratories, USA; [suelee.robbe-austerman@usda.gov](mailto:suelee.robbe-austerman@usda.gov)

<sup>7</sup> INIAV, IP - National Institute for Agrarian and Veterinary Research, Portugal; [ana.botelho@iniav.pt](mailto:ana.botelho@iniav.pt); [teresa.albuquerque@iniav.pt](mailto:teresa.albuquerque@iniav.pt)

\* Correspondence: [mscunha@fc.ul.pt](mailto:mscunha@fc.ul.pt); Tel.: (+351) 217 500 000, ext. 22461

## Supplementary Information

**Supplementary Table S1.** Characteristics of *Mycobacterium bovis* selected for WGS.

| <i>M. bovis</i><br>ID | Sampling<br>date | Host<br>species | Geographic<br>region | Spoligotype <sup>a</sup> | <i>In silico</i><br>spoligotype | MIRU-VNTR profile |           |           |           |            |            |            |           | Ancestral<br>Population <sup>b</sup> |
|-----------------------|------------------|-----------------|----------------------|--------------------------|---------------------------------|-------------------|-----------|-----------|-----------|------------|------------|------------|-----------|--------------------------------------|
|                       |                  |                 |                      |                          |                                 | VNTR<br>3232      | ETR-<br>A | ETR-<br>B | ETR-<br>C | QUB<br>11a | QUB<br>11b | MIRU<br>26 | MIRU<br>4 |                                      |
| Mb0220                | 2003             | Cattle          | Portalegre           | SB1174                   | SB1174                          | 6                 | 4         | 5         | 4         | 11         | 4          | 3          | 5         | AM3                                  |
| Mb0261                | 2006             | Red<br>deer     | Castelo<br>Branco    | SB0120                   | SB0265                          | 4                 | 5         | 4         | 3         | 11         | 2          | 3          | 5         | AM5                                  |
| Mb0601                | 2007             | Cattle          | Beja                 | SB0295                   | SB0295                          | 4                 | 6         | 3         | 4         | 8          | 2          | 3          | 5         | AM2                                  |
| Mb0754                | 2008             | Cattle          | Portalegre           | SB0121                   | SB0121                          | 4                 | 7         | 4         | 5         | 11         | 2          | 3          | 5         | AM1                                  |
| Mb0769                | 2008             | Cattle          | Beja                 | SB0119                   | SB0119                          | 4                 | 6         | 4         | 4         | 11         | 2          | 2          | 5         | AM1                                  |
| Mb0783                | 2008             | Wild<br>boar    | Castelo<br>Branco    | SB0121                   | SB0122                          | 4                 | 6         | 3         | 4         | 11         | 3          | 3          | 5         | AM2                                  |
| Mb0865                | 2008             | Cattle          | Castelo<br>Branco    | SB1090                   | SB1090                          | 4                 | 6         | 4         | 2         | >12        | 2          | 3          | 2         | AM4                                  |
| Mb0891                | 2009             | Red<br>deer     | Castelo<br>Branco    | SB1264                   | SB1264                          | 4                 | 6         | 4         | 2         | 11         | 2          | 3          | 5         | AM5                                  |
| Mb0893                | 2008             | Wild<br>boar    | Castelo<br>Branco    | SB0119                   | SB0121                          | 4                 | 6         | 4         | 4         | 11         | 3          | 3          | 5         | AM2                                  |
| Mb1317                | 2010             | Cattle          | Beja                 | SB0265                   | SB0265                          | 4                 | 1         | 4         | 3         | 11         | 2          | 3          | 5         | AM5                                  |
| Mb1339                | 2010             | Cattle          | Castelo<br>Branco    | SB0122                   | SB0122                          | 4                 | 6         | 3         | 4         | 11         | 3          | 3          | 5         | AM2                                  |
| Mb1458                | 2010             | Wild<br>boar    | Castelo<br>Branco    | SB1232                   | SB1174                          | 4                 | 5         | 5         | 4         | 11         | 4          | 3          | 5         | AM3                                  |
| Mb1480                | 2010             | Cattle          | Portalegre           | SB1174                   | SB1174                          | 4                 | 4         | 5         | 4         | 11         | 4          | 3          | 5         | AM3                                  |
| Mb1654                | 2011             | Cattle          | Portalegre           | SB0121                   | SB0121                          | 4                 | 5         | 4         | 4         | 11         | 2          | 3          | 5         | AM1                                  |
| Mb1670                | 2011             | Red<br>deer     | Castelo<br>Branco    | SB1174                   | SB1174                          | 4                 | 5         | 5         | 4         | 11         | 4          | 3          | 5         | AM3                                  |
| Mb1711                | 2011             | Red<br>deer     | Castelo<br>Branco    | SB1264                   | SB1264                          | 4                 | 5         | 4         | 4         | 11         | 2          | 2          | 5         | AM1                                  |
| Mb1712                | 2011             | Red<br>deer     | Castelo<br>Branco    | SB1195                   | SB1195                          | 4                 | 6         | 4         | 2         | 11         | 2          | 3          | 5         | AM5                                  |

|        |      |           |                |        |        |   |   |   |   |    |   |   |   |     |
|--------|------|-----------|----------------|--------|--------|---|---|---|---|----|---|---|---|-----|
| Mb1714 | 2011 | Cattle    | Castelo Branco | SB0265 | SB0265 | 4 | 5 | 4 | 2 | 11 | 2 | 3 | 5 | AM5 |
| Mb1744 | 2012 | Wild boar | Castelo Branco | SB1264 | SB1264 | 4 | 5 | 4 | 4 | 11 | 2 | 3 | 4 | AM1 |
| Mb1746 | 2012 | Red deer  | Castelo Branco | SB0121 | SB0121 | 4 | 6 | 4 | 4 | 11 | 2 | 3 | 5 | AM5 |
| Mb1758 | 2012 | Cattle    | Portalegre     | SB1264 | SB1264 | 4 | 5 | 4 | 4 | 11 | 2 | 3 | 5 | AM1 |
| Mb1769 | 2012 | Wild boar | Castelo Branco | SB1195 | SB1195 | 4 | 6 | 4 | 2 | 11 | 2 | 3 | 5 | AM5 |
| Mb1785 | 2012 | Red deer  | Beja           | SB1190 | SB1190 | 4 | 6 | 4 | 4 | 11 | 2 | 3 | 5 | AM5 |
| Mb1789 | 2012 | Cattle    | Portalegre     | SB1264 | SB1264 | 4 | 5 | 4 | 4 | 11 | 2 | 2 | 5 | AM1 |
| Mb1841 | 2012 | Cattle    | Portalegre     | SB0121 | SB0121 |   | 5 | 4 | 4 | 11 | 2 | 3 | 5 | AM1 |
| Mb1870 | 2012 | Wild boar | Portalegre     | SB1264 | SB1264 | 4 | 5 | 4 | 4 | 11 | 2 | 3 | 5 | AM1 |
| Mb1915 | 2013 | Red deer  | Castelo Branco | SB0265 | SB0265 | 4 | 5 | 4 | 2 | 11 | 2 | 3 | 5 | AM5 |
| Mb1948 | 2013 | Red deer  | Castelo Branco | SB1174 | SB1174 | 4 | 4 | 5 | 4 | 11 | 4 | 3 | 5 | AM3 |
| Mb1960 | 2013 | Red deer  | Castelo Branco | SB1264 | SB1264 | 4 | 5 | 4 | 4 | 11 | 2 | 3 | 5 | AM5 |
| Mb2026 | 2013 | Cattle    | Portalegre     | SB1095 | SB1190 | - | 6 | 4 | 4 | 11 | 2 | 3 | 5 | AM5 |
| Mb2043 | 2013 | Red deer  | Portalegre     | SB1264 | SB1264 | 4 | 7 | 4 | 4 | 11 | 2 | 2 | 5 | AM1 |
| Mb2067 | 2013 | Wild boar | Beja           | SB1190 | SB1190 | 4 | 6 | 4 | 4 | 11 | 2 | 3 | 5 | AM5 |
| Mb2206 | 2014 | Cattle    | Castelo Branco | SB1190 | SB1190 | 5 | 6 | 4 | 4 | 11 | 2 | 3 | 5 | AM1 |
| Mb2235 | 2014 | Red deer  | Portalegre     | SB1232 | SB1174 | - | 4 | 5 | 4 | 11 | 4 | 3 | 5 | AM3 |
| Mb2267 | 2014 | Cattle    | Portalegre     | SB1174 | SB1174 | 4 | 4 | 5 | 4 | 11 | 4 | 3 | 5 | AM3 |
| Mb2277 | 2014 | Red deer  | Portalegre     | SB1174 | SB1174 | 4 | 4 | 5 | 4 | 11 | 4 | 3 | 5 | AM3 |
| Mb2300 | 2014 | Wild boar | Portalegre     | SB0121 | SB0121 | 4 | 5 | 4 | 4 | 11 | 2 | 3 | 5 | AM1 |

|        |      |           |                |        |        |   |   |   |   |    |   |   |   |     |
|--------|------|-----------|----------------|--------|--------|---|---|---|---|----|---|---|---|-----|
| Mb2310 | 2015 | Red deer  | Portalegre     | SB0122 | SB0122 | 4 | 5 | 3 | 4 | 11 | 3 | 3 | 5 | AM2 |
| Mb2313 | 2015 | Wild boar | Castelo Branco | SB0265 | SB0265 | 4 | 5 | 4 | 2 | 11 | 2 | 3 | 5 | AM5 |
| Mb2325 | 2015 | Red deer  | Beja           | SB0265 | SB0265 | 4 | 1 | 4 | 2 | 11 | 2 | 3 | 5 | AM5 |
| Mb2328 | 2015 | Red deer  | Castelo Branco | SB0122 | SB0122 | 4 | 6 | 3 | 4 | 11 | 3 | 3 | 5 | AM2 |
| Mb2347 | 2015 | Wild boar | Portalegre     | SB1174 | SB1174 | 4 | 4 | 5 | 4 | 11 | 4 | 3 | 5 | AM3 |
| Mb2395 | 2015 | Wild boar | Castelo Branco | SB0121 | SB0121 | 4 | 6 | 4 | 4 | 11 | 2 | 3 | 5 | AM5 |
| Mb2397 | 2015 | Wild boar | Castelo Branco | SB0121 | SB0121 | 5 | 6 | 4 | 4 | 11 | 2 | 3 | 5 | AM1 |

(a) Spoligotyping profile obtained by reverse hybridization method

(b) Classification in ancestral population (AM1 to AM5) as described in Reis et al., 2020.

**Supplementary Table S2.** *Mycobacterium bovis* sequencing statistics details.

| <i>M. bovis</i><br>ID | Sampling<br>date | Host<br>species <sup>(a)</sup> | Geographic<br>region <sup>(b)</sup> | R1size  | R2size  | Allbam<br>mapped<br>reads <sup>(c)</sup> | Genome<br>coverage <sup>(d)</sup> | Average<br>coverage | Average<br>read<br>length | Unmapped<br>reads | Unmapped<br>assembled<br>contigs |
|-----------------------|------------------|--------------------------------|-------------------------------------|---------|---------|------------------------------------------|-----------------------------------|---------------------|---------------------------|-------------------|----------------------------------|
| Mb0220                | 2003             | C                              | PG                                  | 217.8MB | 230.4MB | 2394434                                  | 99.69                             | 126.7               | 238.1                     | 25077             | 2                                |
| Mb0261                | 2006             | RD                             | CB                                  | 448.7MB | 466.7MB | 13725892                                 | 99.92                             | 368.8               | 151.0                     | 2146326           | 13966                            |
| Mb0601                | 2007             | C                              | BJ                                  | 171.7MB | 204.8MB | 191835                                   | 99.73                             | 98.7                | 234.2                     | 22676             | 32                               |
| Mb0754                | 2008             | C                              | PG                                  | 159.0MB | 171.9MB | 1359222                                  | 99.64                             | 72.5                | 240.8                     | 9193              | 4680                             |
| Mb0769                | 2008             | C                              | BJ                                  | 185.4MB | 215.7MB | 2047981                                  | 99.68                             | 108.1               | 240.2                     | 19903             | 3                                |
| Mb0783                | 2008             | WB                             | CB                                  | 191.2MB | 221.1MB | 2012194                                  | 99.66                             | 105.5               | 237.8                     | 22613             | 384                              |
| Mb0865                | 2008             | C                              | CB                                  | 151.7MB | 162.1MB | 1410917                                  | 98.79                             | 73.7                | 242.2                     | 11861             | 366                              |
| Mb0891                | 2009             | RD                             | CB                                  | 404.8MB | 419.0MB | 13142182                                 | 99.91                             | 345.4               | 151.0                     | 1898427           | 74                               |
| Mb0893                | 2008             | WB                             | CB                                  | 169.3MB | 180.7MB | 188456                                   | 99.66                             | 100.6               | 241.1                     | 15639             | 4                                |
| Mb1317                | 2010             | C                              | BJ                                  | 157.2MB | 161.8MB | 1707221                                  | 99.59                             | 91.3                | 241.5                     | 13657             | 1                                |
| Mb1339                | 2010             | C                              | CB                                  | 152.4MB | 172.9MB | 1640461                                  | 99.63                             | 87.2                | 240.5                     | 13024             | 1                                |
| Mb1458                | 2010             | WB                             | CB                                  | 186.3MB | 216.5MB | 192992                                   | 99.67                             | 103.1               | 242.2                     | 19592             | 2                                |
| Mb1480                | 2010             | C                              | PG                                  | 192.4MB | 205.2MB | 205313                                   | 99.64                             | 109.7               | 240.2                     | 19865             | 2273                             |
| Mb1654                | 2011             | C                              | PG                                  | 117.7MB | 130.9MB | 615194                                   | 99.34                             | 33.3                | 236.7                     | 3968              | 60498                            |
| Mb1670                | 2011             | RD                             | CB                                  | 189.5MB | 206.5MB | 2074834                                  | 99.64                             | 110.1               | 239.7                     | 20213             | 121                              |
| Mb1711                | 2011             | RD                             | CB                                  | 161.6MB | 168.0MB | 175829                                   | 99.64                             | 93.2                | 238.1                     | 12588             | 88                               |
| Mb1712                | 2011             | RD                             | CB                                  | 121.4MB | 129.6MB | 1085013                                  | 99.05                             | 55.6                | 241.4                     | 9286              | 2030                             |
| Mb1714                | 2011             | C                              | CB                                  | 101.8MB | 110.3MB | 788996                                   | 99.37                             | 40.5                | 241.3                     | 7143              | 11013                            |
| Mb1744                | 2012             | WB                             | CB                                  | 172.5MB | 188.0MB | 1796448                                  | 99.69                             | 92.5                | 235.1                     | 14316             | 3                                |
| Mb1746                | 2012             | RD                             | CB                                  | 165.0MB | 180.6MB | 1728552                                  | 99.7                              | 88.1                | 233                       | 12827             | 1                                |
| Mb1758                | 2012             | C                              | PG                                  | 163.2MB | 175.3MB | 1732898                                  | 99.52                             | 93.4                | 241.8                     | 14928             | 1412                             |
| Mb1769                | 2012             | WB                             | CB                                  | 135.4MB | 143.5MB | 1374917                                  | 99.15                             | 72                  | 238.6                     | 8851              | 1                                |
| Mb1785                | 2012             | RD                             | BJ                                  | 115.5MB | 120.4MB | 940707                                   | 99.56                             | 49.5                | 240                       | 5925              | 9156                             |
| Mb1789                | 2012             | C                              | PG                                  | 125.4MB | 133.9MB | 970309                                   | 99.49                             | 50.8                | 234.3                     | 6378              | 811                              |

|        |      |    |    |         |         |         |       |       |       |       |       |
|--------|------|----|----|---------|---------|---------|-------|-------|-------|-------|-------|
| Mb1841 | 2012 | C  | PG | 168.9MB | 191.2MB | 176723  | 99.67 | 91.2  | 237.4 | 15809 | 1     |
| Mb1870 | 2012 | WB | PG | 130.8MB | 133.8MB | 1395146 | 99.64 | 67.7  | 223   | 12333 | 30    |
| Mb1915 | 2013 | RD | CB | 137.6MB | 155.4MB | 1423501 | 99.65 | 74    | 239   | 11027 | 5     |
| Mb1948 | 2013 | RD | CB | 153.1MB | 157.7MB | 1523134 | 99.66 | 79.4  | 237.3 | 10609 | 2     |
| Mb1960 | 2013 | RD | CB | 158.6MB | 177.5MB | 1712114 | 99.55 | 91.3  | 239.6 | 13976 | 1584  |
| Mb2026 | 2013 | C  | PG | 134.4MB | 144.7MB | 1236634 | 99.61 | 64.2  | 243   | 12192 | 557   |
| Mb2043 | 2013 | RD | PG | 113.7MB | 121.1MB | 966319  | 99.41 | 50.3  | 241.9 | 7475  | 548   |
| Mb2067 | 2013 | WB | BJ | 178.9MB | 193.9MB | 2004187 | 99.71 | 105.1 | 236   | 19496 | 283   |
| Mb2206 | 2014 | C  | CB | 162.3MB | 184.7MB | 1751017 | 99.72 | 92.7  | 238.1 | 14763 | 2505  |
| Mb2235 | 2014 | RD | PG | 174.0MB | 188.8MB | 1891547 | 99.65 | 100.4 | 238.9 | 16555 | 346   |
| Mb2267 | 2014 | C  | PG | 168.4MB | 185.0MB | 890928  | 99.52 | 46.9  | 234.6 | 6772  | 4287  |
| Mb2277 | 2014 | RD | PG | 68.6MB  | 73.6MB  | 586402  | 99.36 | 29.8  | 241.5 | 4986  | 258   |
| Mb2300 | 2014 | WB | PG | 256.2MB | 268.0MB | 2833579 | 99.75 | 149.2 | 237.7 | 36471 | 38    |
| Mb2310 | 2015 | RD | PG | 132.8MB | 146.4MB | 1290912 | 99.63 | 65.8  | 234.6 | 8582  | 1136  |
| Mb2313 | 2015 | WB | CB | 164.8MB | 186.8MB | 1671813 | 99.65 | 85.3  | 238.3 | 17263 | 1     |
| Mb2325 | 2015 | RD | BJ | 162.0MB | 185.5MB | 1687836 | 99.67 | 86.7  | 237.6 | 15786 | 2     |
| Mb2328 | 2015 | RD | CB | 129.9MB | 150.0MB | 1220275 | 99.48 | 65.4  | 240   | 9374  | 15533 |
| Mb2347 | 2015 | WB | PG | 108.9MB | 124.5MB | 1135051 | 99.56 | 60.4  | 239   | 8944  | 465   |
| Mb2395 | 2015 | WB | CB | 216.4MB | 239.9MB | 2365469 | 99.74 | 124.4 | 237.3 | 27435 | 3     |
| Mb2397 | 2015 | WB | CB | 203.2MB | 215.0MB | 2171022 | 99.58 | 116.4 | 240.9 | 20636 | 1     |

(a) C - Cattle; RD - Red deer; WB - Wild boar

(b) Beja - Beja; CB- Castelo Branco; PG - Portalegre

(c) Number of successfully assembled, trimmed paired-end Illumina reads.

(d) Relative to *M. bovis* reference genome AF2122/97 (NCBI accession number LT708304.1).

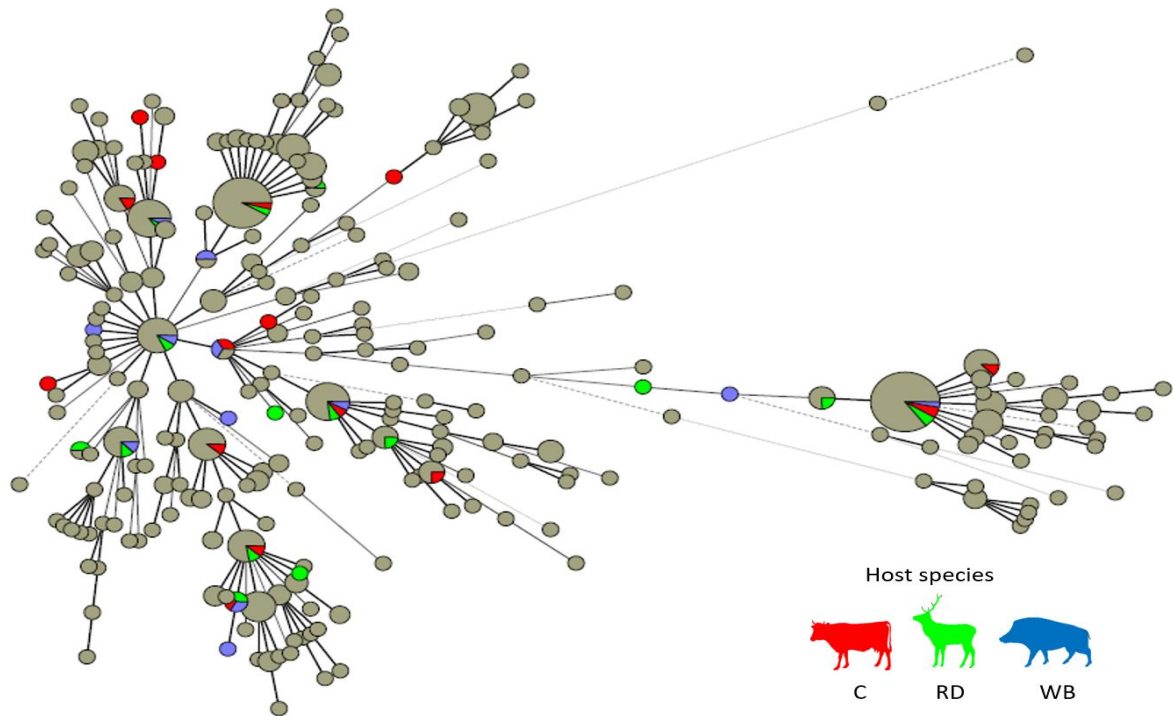

**Supplementary Figure S1.** Minimum spanning tree (MST) illustrating genetic relationships among *M. bovis* ( $n=487$ ) based on spoligotyping and 8-*loci* MIRU-VNTR data, using single *locus* variant analysis. Circle size is proportional to the number of isolates within each node; and colours represent hosts species (cattle - red, red deer - green and wild boar - blue). The complexity of the lines denotes the number of differences in the spoligo-MIRU type profile between two nodes: solid lines (1, 2 or 3 differences), grey dashed lines (4 differences) and grey dotted lines (5 or more differences). Only *M. bovis* selected for WGS are coloured.

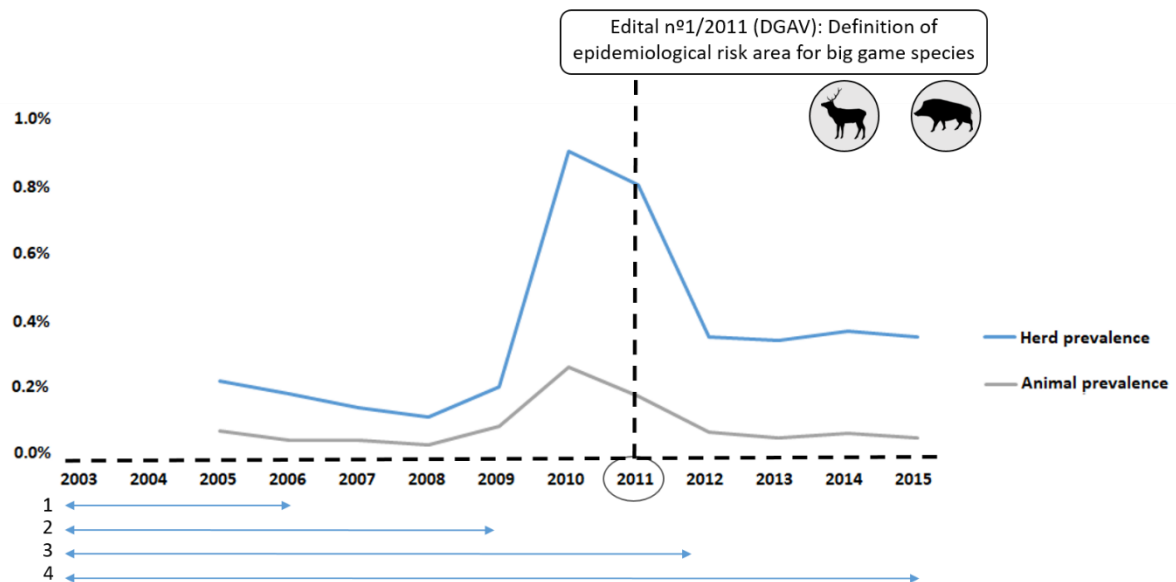

**Supplementary Figure S2.** Timeline of animal tuberculosis in Portugal. The curves represent the evolution of animal TB epidemiological indicators, for cattle population, in mainland Portugal (2003-2017) [Adapted from Relatório Técnico de Sanidade Animal, DGAV (2015)]. The year 2011 marks the definition of epidemiological risk area for big game species. The cumulative time periods considered in this work are evidenced under the timeline. Periods 1 and 2 were pooled to achieve adequate sample sizes.



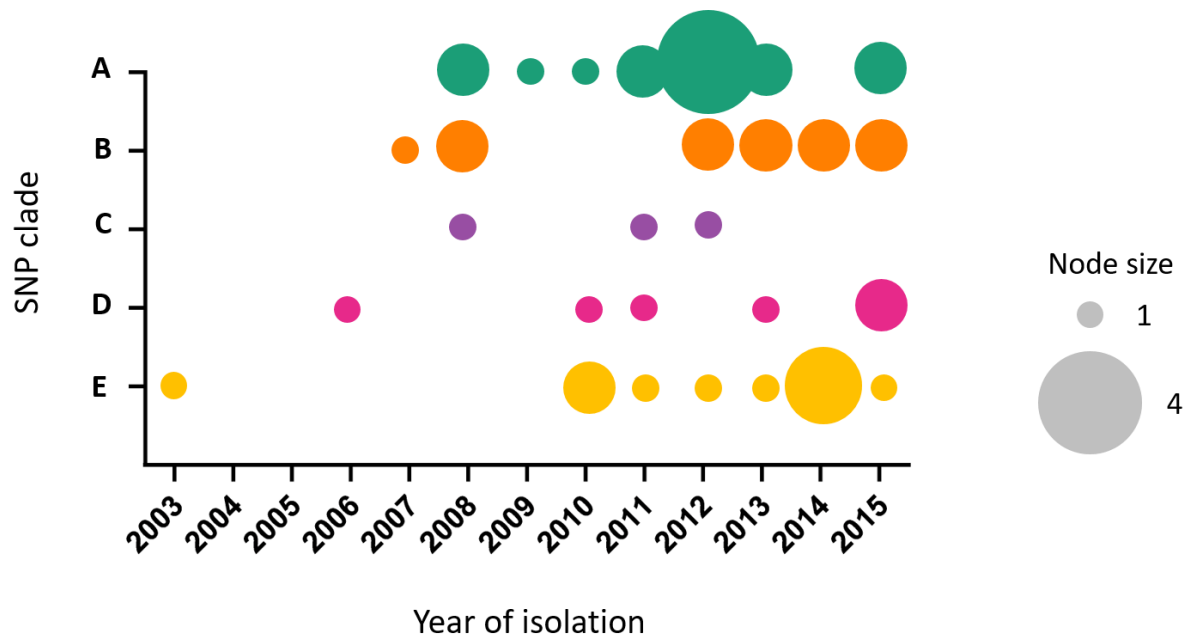

**Supplementary Figure S3.** Temporal distribution of *M. bovis* identified by SNP clade per year. Node size is proportional to the number of *M. bovis* strains within each node.
